# Supplementary material for: Fiducial markers for stereotactic lung radiation therapy: review of the transthoracic, endovascular and endobronchial approaches
Source: PubMed Central journal article supplement — Eur Respir Rev. 2022 Jan 12;31(163):210149. doi: 10.1183/16000617.0149-2021 (PMC9488911; doi:10.1183/16000617.0149-2021), 2022-01-12
Supplement: err-0149-2021_tableS1.supplement.pdf [file err-0149-2021_tableS1.supplement.pdf]

Suppl Table 1

|                                   | Tech.                | No. of Patients | No of inserted FM | Median FEV <sub>1</sub> (%) | Previous major lung surgery (%) | Nodule Size, Mean long axis (mm) | Nodule size, median long axis (mm) | Nodule to pleural median distance (mm) | Pulmonary hemorrhage | Hemoptysis | Median time delay between procedure and planning CT-scan (days) | Migration(%) /FM type         | FM commercial name                            | Tracking rate (%) | Pneumothorax No (% of procedures) | TTbx    |
|-----------------------------------|----------------------|-----------------|-------------------|-----------------------------|---------------------------------|----------------------------------|------------------------------------|----------------------------------------|----------------------|------------|-----------------------------------------------------------------|-------------------------------|-----------------------------------------------|-------------------|-----------------------------------|---------|
| Yousefi et al, 2007 <sup>16</sup> | TT (19 and 20-G)     | 48              | 221               | NP                          | NP                              | NP                               | NP                                 | NP                                     | NP                   | NP         | NP                                                              | NR/linear                     | NR                                            | NR                | 16 (33%) (systematic chest X-ray) | 11(23%) |
| Kothary et al, 2009 <sup>17</sup> | TT (19, 20 and 21-G) | 42              | NP                | NP                          | NP                              | 26 (10-51)                       | NP                                 | NP                                     | 7(16%)               | 1(2%)      | NR                                                              | NP/linear                     | Gold seed Alpha                               | 91%               | 20 (45%)                          | NP      |
| Bhagat et al, 2010 <sup>18</sup>  | TT (18 and 19-G)     | 28              | 59                | NP                          | NP                              | NP                               | NP                                 | NP                                     | NP                   | NP         | NP                                                              | 19%/linear                    | Gold seed Alpha                               | 93%               | 18 (67%) (systematic chest X-ray) | 0%      |
| Hong et al, 2011 <sup>19</sup>    | TT (19 and 22-G)     | 54              | 270               | NP                          | NP                              | NP                               | NP                                 | 0                                      | NP                   | NP         | NP                                                              | 15%/linear<br><1%/coil-spring | Gold seed Alpha (linear), VortX (coil-spring) | 100%              | 22 (38%)                          | 0%      |
| Hong et al, 2013 <sup>20</sup>    | TT (19G and 22G)     | 32              | 147               | NP                          | NP                              | NP                               | NP                                 | 0 (0-25)                               | NP                   | NP         | 8 (range NP)                                                    | 0%/coil-spring<br>7%/linear   | Gold seed Alpha (linear), VortX (coil-spring) | 94%               | NP                                | NP      |
| Trumm et al, 2014 <sup>21</sup>   | TT (18-G)            | 105             | NP                | NP                          | NP                              | NP                               | NP                                 | NP                                     | 32 (30%)             | 3(3%)      | NP (0-21)                                                       | NP                            | NP                                            | 100%              | 35 (33%)                          | NP      |
| Mongeon et al, 2017 <sup>22</sup> | TT (17 and 18 G)     | 109             | 114               | NP                          | NP                              | NP                               | NP                                 | NP                                     | 20(18%)              | 5(4%)      | NP                                                              | 2%/linear                     | Gold seed (home-made)                         | 100%              | 47 (43%)                          | NP      |

Suppl Table 1

|                                 |                          |     |    |    |    |    |    |    |    |         |    |           |                       |      |          |          |
|---------------------------------|--------------------------|-----|----|----|----|----|----|----|----|---------|----|-----------|-----------------------|------|----------|----------|
| Baker et al, 2019 <sup>23</sup> | TT (18-G)                | 30  | 80 | NP      | NP | NP/linear | Gold seed (home-made) | 100% | 10 (33%) | 0%       |
| Baadh et al, 2016 <sup>27</sup> | TT (17G+ gelatin powder) | 125 | NP | 31(25%) | 0% | NP        | Gold seed Civco       | NP   | 11 (9%)  | 77 (62%) |

**Legend:**

FEV1; forced expiratory volume in the 1 second

FM; fiducial marker

Gold seed Alpha; Gold seed Alpha-Omega Service, Bellflower, CA

Gold seed Civco; Gold seed Civco Medical Solutions, Orange City, Iowa

G; gauge needle

NA; not applicable

NP; not published

TT; transthoracic

TTBx; transthoracic biopsy

Vort-X-18<sup>®</sup>; Vort-X-18, Boston scientific, Cork, Ireland
