# Supplementary material for: Fiducial markers for stereotactic lung radiation therapy: review of the transthoracic, endovascular and endobronchial approaches
Source: PubMed Central journal article supplement — Eur Respir Rev. 2022 Jan 12;31(163):210149. doi: 10.1183/16000617.0149-2021 (PMC9488911; doi:10.1183/16000617.0149-2021), 2022-01-12
Supplement: err-0149-2021_tableS2.supplement.pdf [file err-0149-2021_tableS2.supplement.pdf]

Suppl Table 2

| Study                             | Tech. | No. of Patients | No of inserted FM | Median FEV <sub>1</sub> (%) | Previous major lung surgery (%) | Nodule Size, Mean long axis (mm) | Nodule size, median long axis (mm) | Nodule to pleural median distance (mm) | Fluoroscopy | Median time delay between procedure and planning CT-scan (days) | Migration %/ FM type                                        | FM commercial name                                                      | Tracking rate (% of PPL) | Mediastinal infection rate (%) | Pneumothorax No (% of procedures) |
|-----------------------------------|-------|-----------------|-------------------|-----------------------------|---------------------------------|----------------------------------|------------------------------------|----------------------------------------|-------------|-----------------------------------------------------------------|-------------------------------------------------------------|-------------------------------------------------------------------------|--------------------------|--------------------------------|-----------------------------------|
| Prévost et al, 2008 <sup>28</sup> | EV    | 23              | 87                | NP                          | 20%                             | NP (11-55)                       | NP (11-55)                         | NP                                     | Yes         | NP (2-19)                                                       | 29%/coil-spring (non-coiling)<br>7%/coil-spring (migration) | Tornado                                                                 | 100%/coil-spring         | NA                             | No                                |
| Mongeon et al, 2017 <sup>22</sup> | EV    | 15              | 62                | NP                          | NP                              | 22 (9-46)                        | 18 (9-46)                          | NP                                     | Yes         | Yes                                                             | 8%/coil-spring + linear (non-coiling + migration)           | VortX (coil-spring), Nester (coil-spring), Gold seed (home-made linear) | 100%                     | NA                             | No                                |
| Baker et al, 2019 <sup>23</sup>   | EV    | 416             | 1335              | NP                          | NP                              | NP                               | NP                                 | NP                                     | Yes         | NP                                                              | NP/coil-spring                                              | Tornado                                                                 | 100%                     | NA                             | No                                |

## Suppl Table 2

### **Legend:**

EV; endovascular

FEV1; forced expiratory volume in the 1 second

FM; fiducial marker

GA; general anesthesia

NA; not applicable

Nester 18; Nester 18, Cook Medical, Bloomington, Indiana, USA

NP; not published

PPL; peripheral pulmonary lesion

TBx; transbronchial biopsy

Tornado®; Tornado, Cook Medical, Bloomington, Indiana, USA

Vort-X-18®; Vort-X-18, Boston scientific, Cork, Ireland
