# Supplementary material for: Fiducial markers for stereotactic lung radiation therapy: review of the transthoracic, endovascular and endobronchial approaches
Source: PubMed Central journal article supplement — Eur Respir Rev. 2022 Jan 12;31(163):210149. doi: 10.1183/16000617.0149-2021 (PMC9488911; doi:10.1183/16000617.0149-2021), 2022-01-12
Supplement: err-0149-2021_tableS3.supplement.pdf [file err-0149-2021_tableS3.supplement.pdf]

Suppl Table 3

| Study (design)                                      | Tech.                         | No. of Patients | No of inserted FM | Median FEV <sub>1</sub> (%) | Previous major lung surgery (%) | Nodule Size, Mean long axis (mm) | Nodule size, median long axis (mm) | Nodule to pleural median distance (mm) | Type of Anesthesia | Fluoroscopy | Median time delay between procedure and planning CT-scan (days) | Migration(%)/FM type                                    | FM commercial name                               | Tracking rate (%) | Mediastinal infection rate (%) | Pneumothorax No (% of procedures) | TBx rate (% of patients)                             |
|-----------------------------------------------------|-------------------------------|-----------------|-------------------|-----------------------------|---------------------------------|----------------------------------|------------------------------------|----------------------------------------|--------------------|-------------|-----------------------------------------------------------------|---------------------------------------------------------|--------------------------------------------------|-------------------|--------------------------------|-----------------------------------|------------------------------------------------------|
| Anantham et al, 2007 <sup>29</sup> (prospective)    | ENB                           | 8               | 39                | 35% (30-53)                 | 13%                             | 33 (20-57)                       | 38 (20-57)                         | NP                                     | LA                 | No          | NP (7-10)                                                       | 10%/linear                                              | Gold seeds Alpha                                 | 100%              | NA                             | No (systematic chest X-ray)       | NR                                                   |
| Lachkar et al, 2018 <sup>30</sup> (retrospective)   | R-EBUS + virtual bronchoscopy | 34              | 34                | 42 (19-65)                  | 32                              | NP                               | 15 (9-20)                          | 28 (0-68)                              | LA 77%, GA 24%     | No          | 59 (6-150)                                                      | 17.6%/linear                                            | Marker Kit, Best Medical                         | 83%               | NA                             | No (systematic chest X-ray)       | 85%                                                  |
| Hagmeyer et al, 2014 <sup>31</sup> (retrospective)  | ENB                           | 6               | 30                | 34%                         | NP                              | NP                               | NP                                 | NP                                     | GA                 | Yes         | 10-14                                                           | 10%/linear                                              | Gold seed Civco                                  | 100%              | NA                             | No (systematic chest X-ray)       | NP                                                   |
| Harley et al, 2010 <sup>32</sup> (design not clear) | EBUS ± ENB                    | 43              | 161               | NP                          | NP                              | 28 (9-65)                        | NP (9-65)                          | NP                                     | GA                 | Yes         | 10-14                                                           | 13%/linear                                              | 351-2, 351-1 Best                                | 100%              | NA                             | 1 (2)                             | NP (systematic Chest X-ray)                          |
| Dobelbower et al, 2020 <sup>33</sup> (prospective)  | R-EBUS                        | 69              | 207               | NP                          | NP                              | NP                               | NP                                 | NP                                     | NP                 | NP          | NP                                                              | 0%/coil-tailed                                          | Home-made                                        | 99%               | NA                             | 2 (3)                             | 0%                                                   |
| Lachkar et al, 2020 <sup>34</sup> (retrospective)   | R-EBUS                        | 30              | 30                | NP                          | 47                              | NP                               | 15 (8-25)                          | 14 (0-53)                              | LA 60%, GA 40%     | No          | 29 (14-126)                                                     | 0%/coil-tailed                                          | SuperLock                                        | 100%              | NA                             | No (systematic chest X-ray)       | 100                                                  |
| Rong et al, 2015 <sup>43</sup> (retrospective)      | ENB                           | 15              | 55                | NP                          | NP                              | 20 (8-36)                        | 16 (8-36)                          | NP                                     | NP                 | Yes         | NP                                                              | 0%/coil-tailed                                          | SuperLock                                        | 100%              | NA                             | NP                                | 0%                                                   |
| Belanger et al, 2019 <sup>35</sup> (retrospective)  | ENB                           | 65              | 131               | NP                          | NP                              | NP                               | NP (15-28)                         | NP (7-36)                              | GA                 | No          | 7                                                               | <1%/linear + coil-tailed                                | SuperLock (coil-tailed), Visicoil IBA (linear)   | 100%              | NA                             | No                                | NP (overall population; 86% (systematic chest X-ray) |
| Jackson et al, 2016 <sup>42</sup> (prospective)     | R-EBUS                        | 10              | 11                | NP                          | NP                              | NP                               | NP                                 | NP                                     | LA                 | Yes         | NP                                                              | 18%/linear and two-band (migration concerned linear FM) | Visicoil IBA (linear), superDimension (two-band) | NP                | NP                             | NP                                | NP                                                   |

Suppl Table 3

|                                                          |               |             |     |             |     |                      |                      |                  |                   |     |              |                                                       |                                                                                    |      |    |                                    |                                 |
|----------------------------------------------------------|---------------|-------------|-----|-------------|-----|----------------------|----------------------|------------------|-------------------|-----|--------------|-------------------------------------------------------|------------------------------------------------------------------------------------|------|----|------------------------------------|---------------------------------|
| Steinfors et al, 2015 <sup>36</sup><br>(prospective)     | R-EBUS ± ENB  | 15          | 18  | NP          | 19% | 24<br>(5-59)         | 19<br>(5-59)         | NP               | GA                | Yes | NP           | 16%/linear + two-band (migration concerned linear FM) | Visicoil, Robertson (linear), superDimension (two-band)                            | 88%  | NA | No                                 | 50%<br>(systematic chest X-ray) |
| Bowling et al, 2019 <sup>37</sup><br>(prospective)       | ENB ± R-RBUS  | 246/<br>258 | 563 | NP          | NP  | NP                   | NP                   | NP               | LA 32%,<br>GA 68% | ?   | 0<br>(0-341) | 6%/two-three band, + coil-spring + coil-tailed        | superDimension (two and three-band), Vort-X (coil-spring), SuperLock (coil-tailed) | NP   | NA | 14 (5)                             | 83%                             |
| Minnich et al, 2015 <sup>41</sup><br>(retrospective)     | ENB           | 48          | 127 | NP          | NP  | NP                   | NP                   | NP               | GA                | NP  | NP           | 3%/coil-spring<br>27%/two-band<br>30%/linear          | VortX (coil-spring), gold seed, SuperDimension?(two-band)                          | NP   | NA | NP                                 | NP                              |
| Nabavizadeh et al, 2014 <sup>38</sup><br>(retrospective) | ENB+ R-EBUS   | 31          | 105 | NP          | NP  | 23<br>(8-44)         | NP<br>(8-44)         | NP               | GA                | Yes | 24 (5-110)   | 2%/coil-spring                                        | Vort-X                                                                             | 100% | NA | 2 (6%)<br>(systematic chest X-ray) | 91%                             |
| Schroeder et al, 2010 <sup>39</sup><br>(prospective)     | ENB           | 52          | 234 | NA          | NA  | 24<br>(8-53)         | NA                   | NP               | LA                | No  | NP(7-14)     | 53%/linear<br>1%/coil-spring                          | Gold seed Civco (linear), Vort-X (coil-spring)                                     | 97%  | NA | 3 (6)                              | 35%                             |
| Casutt et al, 2021 <sup>40</sup><br>(retrospective)      | ±R-EBUS (47%) | 52          | 207 | 54 (19-118) | 37  | 11-15#<br>(4.0-25.0) | 10-13#<br>(4.0-25.0) | 14-18#<br>(0-66) | LA 78%,<br>GA 22% | Yes | 7 (1-107)    | 8%/coil-spring                                        | Tornado                                                                            | 93%  | NA | No                                 | 13%                             |

### Suppl Table 3

**Legend:**

ENB; electromagnetic navigation bronchoscopy

FEV1; forced expiratory volume in the 1 second

FM; fiducial marker

GA; general anesthesia

Gold seeds Alpha; Gold seeds Alpha-Omega Service, Bellflower, CA

Gold seed Civco; Gold seed Civco Medical Solutions, Orange City, Iowa

LA; local anesthesia

NA; not applicable

NP; not published

R-EBUS; radial-endobronchial ultrasound

SuperLock®; SuperLock, Covidien Inc, Minneapolis, MN

SuperDimension®; SuperDimension, Covidien Inc, Minneapolis MN

TBx; transbronchial biopsy

Tornado®; Tornado, Cook Medical, Bloomington, Indiana, USA

Visicoil™ IBA; Visicoil, IBA Dosimetry, Barlett, TN

Visicoil™, Robertson; Visicoil, Robertson medical, Coffs Harbour, Australia

Vort-X-35® or Vort-X-18®; Vort-X-35 or Vort-X-18, Boston scientific, Cork, Ireland

351-2, 351-1 Best; 351-2, 351-1 Marker Kit, Best Medical International

# ; two observer

\*: previous lobectomy or pneumonectomy

°: authors described two-band FM insertion but SuperLock, Covidien was noted in the methodology (SuperDimension, Covidien is a two-band FM)
